# Supplementary material
Source: publisher site journal article supplement (https://www.spandidos-publications.com/7387/downloadSupplementary)
Supplement: Supplementary file 1 [file downloadSupplementary]

## Sheet: Table S2
Table SII. Detected 197 deafness-related variant genes in 253 hearing loss patients.
patient ID	gene	nucleotide	clinicalJudge	refLocal	refTranscript	exon	aminoAcid	geneType	highestMaf	pathogenicGrade	inhert	geneticSource	diseases	diseasePhenotypes	sex	age	analysisResult
3			0	chrM-1555				0.9526				unverified			F	6y	Highly suspicious variants associated with the disease phenotype
7	MYH9	c.5780C>T	0	chr22-36678817	NM_002473	exon41	p.P1927L	het		Likely pathogenic	1.AD 2.AD 3.AD 4.AD 5.AD 6.AD	de novo	1.Sebastian综合征2.May-Hegglin异常3.Fechtner综合征4.常染色体显性耳聋17型5.Epstein综合征6.巨血小板减少症和进行性感觉神经性聋		M	5m	Highly suspicious variants associated with the disease phenotype
6	COL4A6	c.626C>G	1	chrX-107448912	NM_001847	exon10	p.P209R	hemi	0.0003	Uncertain	XR	Maternal	X连锁耳聋6型		M	4y	Highly suspicious variants associated with the disease phenotype
6	MITF	c.859G>A	1	chr3-70013998	NM_000248	exon9	p.E287K	het		Uncertain	1.AD 2.AD 3.AD 4.AD 5.- 6.AR	Maternal	1.瓦登伯格综合征2A型2.双等位基因瓦登伯格综合征伴白化病3.眼白化病伴神经性耳聋4.色素异常及聋哑综合征5.皮肤恶性黑色素瘤易感8型6.COMMAD syndrome		M	4y	Highly suspicious variants associated with the disease phenotype
6	MYO15A	c.3026C>A	1	chr17-18025140	NM_016239	exon2	p.P1009H	het	0.0056	Uncertain	AR	Maternal	常染色体隐性耳聋3型		M	4y	Highly suspicious variants associated with the disease phenotype
6	MYO15A	c.9559C>T	1	chr17-18065940	NM_016239	exon57	p.R3187C	het	0.0002	Uncertain	AR	Paternal	常染色体隐性耳聋3型		M	4y	Highly suspicious variants associated with the disease phenotype
6	MYO3A	c.2440T>C	1	chr10-26434398	NM_017433	exon22	p.S814P	het		Uncertain	AR	Paternal	常染色体隐性耳聋30型		M	4y	Highly suspicious variants associated with the disease phenotype
6	WFS1	c.709G>A	1	chr4-6293721	NM_006005	exon6	p.E237K	het		Uncertain	1.- 2.AR 3.AD 4.AD 5.AD	Paternal	1.非胰岛素依赖性糖尿病2.Wolfram综合征1型3.常染色体显性耳聋6型4.常染色体显性遗传Wolfram样综合征5.白内障41型		M	4y	Highly suspicious variants associated with the disease phenotype
15	SLC26A4	c.754T>C	0	chr7-107315543	NM_000441	exon6	p.S252P	het		pathogenic	1.AR 2.AR	Paternal	1.常染色体隐性耳聋4型伴前庭导水管扩大2.Pendred综合征		F	3m	Highly suspicious variants associated with the disease phenotype
15	SLC26A4	c.919-2A>G	0	chr7-107323898	NM_000441	exon8	splicing	het		pathogenic	1.AR 2.AR	Maternal	1.常染色体隐性耳聋4型伴前庭导水管扩大2.Pendred综合征		F	3m	Highly suspicious variants associated with the disease phenotype
9	GJB2	c.299_300del	0	chr13-20763420-20763422	NM_004004	exon2	p.H100Rfs*14	het		pathogenic	AR	Maternal	Deafness, autosomal recessive 1		F	4m	Highly suspicious variants associated with the disease phenotype
9	GJB2	c.235delC	0	chr13-20763485-20763486	NM_004004	exon2	p.L79Cfs*3	het	0.0016	pathogenic	AR	Paternal	Deafness, autosomal recessive 1		F	4m	Highly suspicious variants associated with the disease phenotype
11	FGFR3	c.931-2A>G	0	chr4-1804639	NM_001163213	exon8	splicing	het		Likely pathogenic	1.AD 2.- 3.AD 4.AD 5.AD,AR 6.AD 7.AD 8.AD 9.AD 10.AD	Paternal	1.软骨发育不良2.表皮痣3.软骨发育不全4.泪管-耳-齿-指综合征5.小指僵直、身材高大及耳聋综合征6.致死性发育不良II型7.致死性发育不全1型8.Muenke综合征9.重型软骨发育不全伴发育迟缓及黑棘皮症10.Crouzon-皮肤-骨骼综合征		M	3m	Highly suspicious variants associated with the disease phenotype
14	TYR	c.1265G>A	0	chr11-89018021	NM_000372	exon4	p.R422Q	het	0.0002	Likely pathogenic	1.AR 2.AR 3.AR 4.AD	Maternal	1.眼皮肤白化病1A型2.眼皮肤白化病1B型3.双等位基因瓦登伯格综合征伴白化病4.眼白化病伴神经性耳聋		M	3m	Highly suspicious variants associated with the disease phenotype
52			0	chrM-1555				0.9697				unverified			M	1m	Highly suspicious variants associated with the disease phenotype
12	POU3F4	c.975G>A	0	chrX-82764307	NM_000307	exon1	p.W325X	hemi		pathogenic	XR	Maternal	X连锁耳聋2型		M	1.6y	Highly suspicious variants associated with the disease phenotype
25	GJB2	c.235delC	0	chr13-20763485-20763486	NM_004004	exon2	p.L79Cfs*3	hom	0.0016	pathogenic	AR	parent	Deafness, autosomal recessive 1		M	1.6y	Highly suspicious variants associated with the disease phenotype
25	USH2A	c.100C>T	0	chr1-216595579	NM_206933	exon2	p.R34X	hom		pathogenic	1.- 2.AR	parent	1.视网膜色素变性39型2.Usher综合征IIA型		M	1.6y	Highly suspicious variants associated with the disease phenotype
27	DSPP	c.1052_1053del	0	chr4-88534389-88534391	NM_014208	exon4	p.S352Qfs*6	het		Likely pathogenic	1.AD 2.AD 3.AD 4.AD	Paternal	1.常染色体显性耳聋39型伴牙本质发育不全1型2.牙本质发育异常2型3.牙本质发生不全3型4.牙本质发生不全1型		F	6m	Highly suspicious variants associated with the disease phenotype
27	POLR1D	c.299T>C	0	chr13-28197284	NM_015972	exon2	p.L100P	het		Likely pathogenic	AD	de novo	颌骨颜面发育不全综合征2型		F	6m	Highly suspicious variants associated with the disease phenotype
24	MYO7A	c.2107G>A	0	chr11-76886430	NM_000260	exon18	p.G703R	het	0.0002	Uncertain	1.AR 2.AD 3.AR	Maternal	1.Usher综合征IB型2.常染色体显性耳聋11型3.常染色体隐性耳聋2型		F	3m	Mutations that may be associated with disease but whose pathogenicity is unknown
24	MYO7A	c.2762G>A	0	chr11-76892493	NM_000260	exon23	p.R921Q	het		Uncertain	1.AR 2.AD 3.AR	Paternal	1.Usher综合征IB型2.常染色体显性耳聋11型3.常染色体隐性耳聋2型		F	3m	Mutations that may be associated with disease but whose pathogenicity is unknown
20	SLC26A4	c.416_418del	0	chr7-107314594-107314611	NM_000441	exon5	p.139_140del	het		Likely pathogenic	1.AR 2.AR	Maternal	1.常染色体隐性耳聋4型伴前庭导水管扩大2.Pendred综合征		F	5y	Highly suspicious variants associated with the disease phenotype
20	SLC26A4	c.919-2A>G	0	chr7-107323898	NM_000441	exon8	splicing	het		pathogenic	1.AR 2.AR	Paternal	1.常染色体隐性耳聋4型伴前庭导水管扩大2.Pendred综合征		F	5y	Highly suspicious variants associated with the disease phenotype
16	TMIE	c.274C>T	0	chr3-46750678	NM_147196	exon3	p.R92W	hom		Likely pathogenic	AR	parent	常染色体隐性耳聋6型		M	3y	Highly suspicious variants associated with the disease phenotype
23	EYA4	c.978C>G	0	chr6-133802608	NM_004100	exon12	p.F326L	het		Likely pathogenic	1.AD 2.AD	Maternal	1.常染色体显性耳聋10型2.扩张性心肌病1J型		M	8m	Highly suspicious variants associated with the disease phenotype
28	GJB2	c.299_300del	0	chr13-20763420-20763422	NM_004004	exon2	p.H100Rfs*14	het	0.0006	pathogenic	AR	Paternal	Deafness, autosomal recessive 1		F	4m	Highly suspicious variants associated with the disease phenotype
28	GJB2	c.235delC	0	chr13-20763485-20763486	NM_004004	exon2	p.L79Cfs*3	het	0.0152	pathogenic	AR	Maternal	Deafness, autosomal recessive 1		F	4m	Highly suspicious variants associated with the disease phenotype
35	OTOA	c.1486A>G	0	chr16-21726471	NM_144672	exon13	p.K496E	het		Uncertain	AR	Paternal	常染色体隐性耳聋22型		M	5.9y	Mutations that may be associated with disease but whose pathogenicity is unknown
35	OTOA	c.1764delC	0	chr16-21730782-21730783	NM_144672	exon16	p.Q589Rfs*55	het	0.0003	Likely pathogenic	AR	Maternal	常染色体隐性耳聋22型		M	5.9y	Mutations that may be associated with disease but whose pathogenicity is unknown
34	GJB2	c.235delC	0	chr13-20763485-20763486	NM_004004	exon2	p.L79Cfs*3	hom	0.0152	pathogenic	AR	unverified	Deafness, autosomal recessive 1		F	7.9y	Highly suspicious variants associated with the disease phenotype
32	SEMA3E	c.1027_1028del	0	chr7-83032062-83032064	NM_012431	exon10	p.V343Lfs*5	het		Likely pathogenic	AD	Maternal	CHARGE综合征		F	7m	Highly suspicious variants associated with the disease phenotype
16			0	chrM-11778				0.1275				unverified			M	3m	Highly suspicious variants associated with the disease phenotype
50	GJB2	c.235delC	0	chr13-20763485-20763486	NM_004004	exon2	p.L79Cfs*3	hom	0.01522	Uncertain	AR	parent	Deafness, autosomal recessive 1		F	10y	Mutations that may be associated with disease but whose pathogenicity is unknown
46	MYO15A	c.6437G>A	0	chr17-18049349	NM_016239	exon29	p.R2146Q	het	1e-05	Likely pathogenic	AR	Maternal	常染色体隐性耳聋3型		M	1.5y	Highly suspicious variants associated with the disease phenotype
46	MYO15A	c.10419_10423delCAGCT	0	chr17-18077162-18077167	NM_016239	exon64	p.S3474Pfs*42	het		pathogenic	AR	Paternal	常染色体隐性耳聋3型		M	1.5y	Highly suspicious variants associated with the disease phenotype
78	PTPN11	c.836A>G	0	chr12-112910827	NM_002834	exon7	p.Y279C	het		Likely pathogenic	1.- 2.AD 3.AD 4.AD	de novo	1.青少年粒单核细胞白血病2.努南综合征1型3.混合性软骨瘤病4.多发性雀斑样痣综合征1型		M	3m	Highly suspicious variants associated with the disease phenotype
76	MYO15A	c.3862delC	0	chr17-18029765-18029766	NM_016239	exon5	p.P1289Rfs*23	het		Pathogenic	AR	Maternal	常染色体隐性耳聋3型		F	9.5y	Highly suspicious variants associated with the disease phenotype
76	MYO15A	c.9163C>T	0	chr17-18062595	NM_016239	exon53	p.L3055F	het		Uncertain	AR	Paternal	常染色体隐性耳聋3型		F	9.5y	Highly suspicious variants associated with the disease phenotype
83	USH2A	c.7772_7781delACCCATACAC	0	chr1-216062209-216062219	NM_206933	exon41	p.H2591Lfs*7	het		Likely pathogenic	1.AR 2.AR	Paternal	1.视网膜色素变性39型2.Usher综合征IIA型		F	1.7y	Highly suspicious variants associated with the disease phenotype
83	USH2A	c.5608C>T	0	chr1-216246607	NM_206933	exon28	p.R1870W	het	0.0049	Uncertain	1.AR 2.AR	Paternal	1.视网膜色素变性39型2.Usher综合征IIA型		F	1.7y	Highly suspicious variants associated with the disease phenotype
83	USH2A	c.4576G>A	0	chr1-216348645	NM_206933	exon21	p.G1526R	het	1e-05	Likely pathogenic	1.AR 2.AR	Maternal	1.视网膜色素变性39型2.Usher综合征IIA型		F	1.7y	Highly suspicious variants associated with the disease phenotype
71	SALL1	c.2796dupC	0	chr16-51173336-51173336	NM_002968	exon2	p.N933Qfs*13	het		Pathogenic	AD	de novo	Townes-Brocks综合征		M	8m	Highly suspicious variants associated with the disease phenotype
82	GJB2	c.235delC	0	chr13-20763485-20763486	NM_004004	exon2	p.L79Cfs*3	het	0.01522	Pathogenic	AR	Paternal	Deafness, autosomal recessive 1		M	1y	Highly suspicious variants associated with the disease phenotype
82	GJB2	c.109G>A	0	chr13-20763612	NM_004004	exon2	p.V37I	het	0.0724	Uncertain	AR	Maternal	Deafness, autosomal recessive 1		M	1y	Highly suspicious variants associated with the disease phenotype
77	SOX10	c.335T>C	0	chr22-38379457	NM_006941	exon2	p.M112T	het		Likely pathogenic	1.AD 2.AD 3.AD	de novo	1.周围脱髓鞘神经病、中央髓鞘形成障碍、瓦登伯格综合征及hirschsprung病2.瓦登伯格综合征2E型3.瓦登伯格综合征4C型		M	3m	Highly suspicious variants associated with the disease phenotype
58	CDH23	c.137C>A	0	chr10-73206144	NM_022124	exon3	p.T46K	het	2e-05	Likely pathogenic	1.AR 2.AR	Paternal	1.双基因Usher综合征ID/F型2.常染色体隐性耳聋12型		M	11m	Highly suspicious variants associated with the disease phenotype
58	CDH23	c.9904G>A	0	chr10-73574874	NM_022124	exon68	p.E3302K	het	0.0003	Likely pathogenic	1.AR 2.AR	Paternal	1.双基因Usher综合征ID/F型2.常染色体隐性耳聋12型		M	11m	Highly suspicious variants associated with the disease phenotype
68	GJB2	c.299_300delAT	0	chr13-20763420-20763422	NM_004004	exon2	p.H100Rfs*14	het	0.0006	pathogenic	AR	unverified	Deafness, autosomal recessive 1		F	3y	Highly suspicious variants associated with the disease phenotype
68	GJB2	c.235delC	0	chr13-20763485-20763486	NM_004004	exon2	p.L79Cfs*3	het	0.01522	pathogenic	AR	Maternal	Deafness, autosomal recessive 1		F	3y	Highly suspicious variants associated with the disease phenotype
63	GJB2	c.235delC	0	chr13-20763485-20763486	NM_004004	exon2	p.L79Cfs*3	hom	0.01522	pathogenic	AR	Maternal	Deafness, autosomal recessive 1		M	5m	Highly suspicious variants associated with the disease phenotype
66	GJB2	c.235delC	0	chr13-20763485-20763486	NM_004004	exon2	p.L79Cfs*3	het	0.01522	pathogenic	AR	Maternal	Deafness, autosomal recessive 1		F	6y	Highly suspicious variants associated with the disease phenotype
66	GJB2	c.109G>A	0	chr13-20763612	NM_004004	exon2	p.V37I	het	0.0724	Uncertain	AR	Paternal	Deafness, autosomal recessive 1		F	6y	Highly suspicious variants associated with the disease phenotype
62	KCNQ4	c.1876-1G>A	0	chr1-41303982	NM_004700	exon14	splicing	het		Likely pathogenic	AD	Maternal	常染色体显性耳聋2A型		M	6y	Highly suspicious variants associated with the disease phenotype
61	SLC26A4	c.919-2A>G	0	chr7-107323898	NM_000441	exon8	splicing	het	0.0087	pathogenic	1.AR 2.AR	Paternal	1.常染色体隐性耳聋4型伴前庭导水管扩大2.Pendred综合征		M	4.9y	Highly suspicious variants associated with the disease phenotype
61	SLC26A4	c.2326C>G	0	chr7-107355874	NM_000441	exon21	p.R776G	het		Likely pathogenic	1.AR 2.AR	Maternal	1.常染色体隐性耳聋4型伴前庭导水管扩大2.Pendred综合征		M	4.9y	Highly suspicious variants associated with the disease phenotype
73	GJB2	c.235delC	0	chr13-20763485-20763486	NM_004004	exon2	p.L79Cfs*3	hom	0.01522	pathogenic	AR	parent	Deafness, autosomal recessive 1		M	6m	Highly suspicious variants associated with the disease phenotype
114	SLC26A4	c.2168A>G	0	chr7-107350577	NM_000441	exon19	p.H723R	het	0.0017	Likely pathogenic	1.AR|2.AR	Paternal	1.常染色体隐性耳聋4型伴前庭导水管扩大(OMIM:600791)|2.Pendred综合征(OMIM:274600)	1.HP:0000007(常染色体隐性遗传);HP:0000407(感音神经性耳聋);HP:0011387(前庭导水管扩大)|2.HP:0000007(常染色体隐性遗传);HP:0000853(甲状腺肿);HP:0001249(智力残疾);HP:0001751(前庭功能障碍);HP:0001939(代谢紊乱/稳态失衡);HP:0002890(甲状腺癌);HP:0008223(代偿性甲状腺功能减退症);HP:0008527(先天性感音神经性听力障碍);HP:0008554(耳蜗畸形)	M	5m	Highly suspicious variants associated with the disease phenotype
114	SLC26A4	c.279T>A		chr7- 107303855	NM_0004 41	exon3	p.S93R	het		Likely pathoge nic		Maternal			M	5m
81	USH2A	c.9915G>C	0	chr1-215972292	NM_206933	exon50	p.E3305D	het	0.0169	Uncertain	1.AR 2.AR	Paternal	1.视网膜色素变性39型2.Usher综合征IIA型		M	3.5y	Highly suspicious variants associated with the disease phenotype
81	USH2A	c.7068T>G	0	chr1-216138711	NM_206933	exon37	p.N2356K	het	0.01087	Uncertain	1.AR 2.AR	Paternal	1.视网膜色素变性39型2.Usher综合征IIA型		M	3.5y	Highly suspicious variants associated with the disease phenotype
81	USH2A		0	del		wholegene		het				unverified			M	3.5y	Highly suspicious variants associated with the disease phenotype
80	GJB2	c.235delC	0	chr13-20763485-20763486	NM_004004	exon2	p.L79Cfs*3	het	0.01522	Pathogenic	AR	unverified	Deafness, autosomal recessive 1		F	6m	Highly suspicious variants associated with the disease phenotype
80	GJB2	c.35G>T	0	chr13-20763686	NM_004004	exon2	p.G12V	het	5e-05	Likely pathogenic	AR	Paternal	Deafness, autosomal recessive 1		F	6m	Highly suspicious variants associated with the disease phenotype
86	PAX3	c.587_593delCCTCAGC	0	chr2-223096995-223097002	NM_181457	exon5	p.A196Dfs*18	het		Pathogenic	1.AD 2.AD,AR 3.AR 4.AD	de novo	1.颅面-耳聋-手综合征2.瓦登伯格综合征3型3.横纹肌肉瘤2型4.瓦登伯格综合征1型		F	3m	Highly suspicious variants associated with the disease phenotype
88	GJB2	c.235delC	0	chr13-20763485-20763486	NM_004004	exon2	p.L79Cfs*3	hom	0.01522	Pathogenic	AR	parent	Deafness, autosomal recessive 1		M	1.6y	Highly suspicious variants associated with the disease phenotype
89	SLC26A4	c.1174A>T	0	chr7-107330593	NM_000441	exon10	p.N392Y	het	0.0002	Likely pathogenic	1.AR 2.AR	Paternal	1.常染色体隐性耳聋4型伴前庭导水管扩大2.Pendred综合征		F	1y	Highly suspicious variants associated with the disease phenotype
89	SLC26A4	c.2027T>A	0	chr7-107342495	NM_000441	exon17	p.L676Q	het		Likely pathogenic	1.AR 2.AR	Maternal	1.常染色体隐性耳聋4型伴前庭导水管扩大2.Pendred综合征		F	1y	Highly suspicious variants associated with the disease phenotype
179	FGFR2	c.833G>T	0	chr10-123279599	NM_000141	exon7	p.C278F	het	1e-05	Pathogenic	1.AD|2.AD|3.AD|4.AD|5.AD|6.AD|7.AD|8.AD|9.AD|10.-|11.AD	de novo	1.Saethre-Chotzen综合征(OMIM:101400)|2.泪管-耳-齿-指综合征(OMIM:149730)|3.Crouzon综合征(OMIM:123500)|4.Pfeiffer综合征(OMIM:101600)|5.Apert综合征(OMIM:101200)|6.Jackson-Weiss综合征(OMIM:123150)|7.弯曲骨发育不良综合征(OMIM:614592)|8.胃癌(OMIM:613659)|9.Antley-Bixler综合征不伴生殖异常或甾体合成异常(OMIM:207410)|10.1舟状头、上颌后退伴精神迟滞(OMIM:609579)|11.1Beare-Stevenson脓疱性皮肤综合征(OMIM:123790)	1.腭裂(HP:0000175);上腭狭窄(HP:0000189);短头畸形(HP:0000248);尖头畸形(HP:0000263);颅缝闭合延迟(HP:0000270);平颧骨(HP:0000272);前发际低(HP:0000294);眼距过宽(HP:0000316);面部不对称(HP:0000324);上颌骨发育不全(HP:0000327);额头高(HP:0000348);听力障碍(HP:0000365);低位耳(HP:0000369);凸鼻嵴(HP:0000444);鼻子狭窄(HP:0000460);斜视(HP:0000486);上睑下垂(HP:0000508);先天性开角型青光眼(HP:0000557);浅眼眶(HP:0000586);鼻泪系统的异常(HP:0000614);短指畸形综合征(HP:0001156);智力残疾(HP:0001249);斜头畸形(HP:0001357…	F	4.7y	Highly suspicious variants associated with the disease phenotype
97	GJB2	c.235delC	0	chr13-20763485-20763486	NM_004004	exon2	p.L79Cfs*3	het	0.01522	Pathogenic	AR	Maternal	Deafness, autosomal recessive 1		M	10.5y	Mutations that may be associated with disease but whose pathogenicity is unknown
97	GJB2	c.109G>A	0	chr13-20763612	NM_004004	exon2	p.V37I	het	0.0724	Uncertain	AR	Paternal	Deafness, autosomal recessive 1		M	10.5y	Mutations that may be associated with disease but whose pathogenicity is unknown
100	STRC		0	del		wholegene		hom				unverified			M	4m	Highly suspicious variants associated with the disease phenotype
95	GJB2	c.235delC	0	chr13-20763485-20763486	NM_004004	exon2	p.L79Cfs*3	het	0.01522	Pathogenic	AR	Paternal	Deafness, autosomal recessive 1		M	3.1y	Mutations that may be associated with disease but whose pathogenicity is unknown
95	GJB2	c.109G>A	0	chr13-20763612	NM_004004	exon2	p.V37I	het	0.0724	Uncertain	AR	Maternal	Deafness, autosomal recessive 1		M	3.1y	Mutations that may be associated with disease but whose pathogenicity is unknown
95	MYO1A	c.501delT	1	chr12-57440686-57440687	NM_005379	exon7	p.F167Lfs*22	het	0.00217	Uncertain	AD	Paternal	常染色体显性耳聋48型		M	3.1y	Mutations that may be associated with disease but whose pathogenicity is unknown
111	GJB2	c.235delC	0	chr13-20763485-20763486	NM_004004	exon2	p.L79Cfs*3	hom	0.005	Pathogenic	1.AD|2.AD|3.AD|4.AD|5.AD|6.AR|7.AD	unverified	1.高起样鱼鳞病伴耳聋(OMIM:602540)|2.常染色体显性耳聋3A型(OMIM:601544)|3.角膜炎-鱼鳞病-耳聋综合征(OMIM:148210)|4.残毁性掌跖角皮症(OMIM:124500)|5.Bart-Pumphrey综合征(OMIM:149200)|6.常染色体隐性耳聋1A型(OMIM:220290)|7.掌跖皮肤角化病伴耳聋(OMIM:148350)	1.HP:0000006(常染色体显性遗传);HP:0000407(感音神经性耳聋);HP:0000535(眉毛稀疏);HP:0000561(无睫毛);HP:0000653(睫毛稀疏);HP:0000982(掌跖角化症);HP:0001019(剥脱性皮炎);HP:0001761(高弓足);HP:0002860(鳞状细胞癌);HP:0003593(小儿发病);HP:0004552(头皮瘢痕性秃发);HP:0008064(鱼鳞病);HP:0011859(点状角膜炎)|2.HP:0000006(常染色体显性遗传);HP:0000407(感音神经性耳聋)|3.HP:0000006(常染色体显性遗传);HP:0000221(沟裂舌);HP:0000407(感音神经性耳聋);HP:0000495(复发性角膜糜烂);HP:0000535(眉毛稀疏);HP:0000559(角膜瘢痕);HP:000061…	F	6.5y	Highly suspicious variants associated with the disease phenotype
108	MITF	c.641_643delGAA	0	chr3-70005611-70005614	NM_000248	exon7	p.214_215delRRinsR	het		Pathogenic	1. AR 2. AD 3. AD 4. AD 5. -	de novo	1. COMMAND综合症 2. Tietz白化病耳聋综合征 3. 双等位基因瓦登伯格综合征伴白化病 4. 瓦登伯格综合征2A型 5. 皮肤恶性黑色素瘤易感8型		F	2y	Highly suspicious variants associated with the disease phenotype
112	ACTG1	c.439C>T	0	chr17-79478577	NM_001614	exon4	p.R147C	het		Likely pathogenic	1.AD|2.AD	unverified	1.Baraitser-Winter综合征2型(OMIM:614583)|2.常染色体显性耳聋20型(OMIM:604717)	1.HP:0000006(常染色体显性遗传);HP:0000154(宽嘴);HP:0000219(薄上唇);HP:0000243(三角头畸形);HP:0000307(尖下巴);HP:0000316(眼距过宽);HP:0000343(长人中);HP:0000365(听力障碍);HP:0000377(耳廓异常);HP:0000508(上睑下垂);HP:0000589(缺损);HP:0000637(长睑裂);HP:0001249(智力残疾);HP:0001250(癫痫发作);HP:0001339(无脑回畸形);HP:0002553(高拱形眉毛);HP:0005484(出生后小头畸形)|2.HP:0000006(常染色体显性遗传);HP:0000408(渐进性感音神经性听力损失);HP:0008619(双侧感音神经性听觉障碍);HP:0011462(成年早期发病)	M	6m	Highly suspicious variants associated with the disease phenotype
112	MYO6	c.2354A>G	1	chr6-76591473	NM_004999	exon23	p.N785S	het		Uncertain	1.AR|2.AD	unverified	1.常染色体隐性耳聋37型(OMIM:607821)|2.常染色体显性耳聋22型(OMIM:606346)	1.HP:0000007(常染色体隐性遗传);HP:0000407(感音神经性耳聋)|2.HP:0000006(常染色体显性遗传);HP:0000407(感音神经性耳聋)	M	6m	Highly suspicious variants associated with the disease phenotype
112	TNC	c.883G>A	1	chr9-117849127	NM_002160	exon3	p.V295M	het	4e-05	Uncertain	AD	unverified	常染色体显性耳聋56型(OMIM:615629)	HP:0000006(常染色体显性遗传);HP:0000365(听力障碍)	M	6m	Highly suspicious variants associated with the disease phenotype
103	COL2A1	c.2958+1G>A	0	chr12-48371382	NM_033150	exon44	splicing	het	1e-05	Likely pathogenic	1.- 2.AD 3.AD 4.AD 5.AD 6.AD 7.AD 8.AD 9.AD 10.AD 11.AD 12.AD 13.AD 14.AD 15.AD	Maternal	1.玻璃体视网膜病变伴指骨骨骺发育不良2.骨关节炎伴轻度软骨发育不全3.软骨生成不全2型4.Czech发育不良5.Stanescu型脊椎骺发育不全6.Kniest发育不良7.原发性股骨头缺血性坏死8.先天性脊椎骺发育不全9.多发性骨骺发育异常伴近视和传导性耳聋10.累-卡-佩三氏病11.非典型史蒂克勒氏综合征12.Strudwick型脊椎干骺端发育不全13.Torrance型椎骨体扁平性致死性骨骼发育不良14.史蒂克勒氏综合征1型15.脊柱外周发育不良		M	2y	Highly suspicious variants associated with the disease phenotype
116	GJB2	c.176_191del	0	chr13-20763529-20763545	NM_004004	exon2	p.V59Sfs*18	het	0.0002	Pathogenic	1.AD|2.AD|3.AD|4.AD|5.AD|6.AR|7.AD	unverified	1.高起样鱼鳞病伴耳聋(OMIM:602540)|2.常染色体显性耳聋3A型(OMIM:601544)|3.角膜炎-鱼鳞病-耳聋综合征(OMIM:148210)|4.残毁性掌跖角皮症(OMIM:124500)|5.Bart-Pumphrey综合征(OMIM:149200)|6.常染色体隐性耳聋1A型(OMIM:220290)|7.掌跖皮肤角化病伴耳聋(OMIM:148350)	1.HP:0000006(常染色体显性遗传);HP:0000407(感音神经性耳聋);HP:0000535(眉毛稀疏);HP:0000561(无睫毛);HP:0000653(睫毛稀疏);HP:0000982(掌跖角化症);HP:0001019(剥脱性皮炎);HP:0001761(高弓足);HP:0002860(鳞状细胞癌);HP:0003593(小儿发病);HP:0004552(头皮瘢痕性秃发);HP:0008064(鱼鳞病);HP:0011859(点状角膜炎)|2.HP:0000006(常染色体显性遗传);HP:0000407(感音神经性耳聋)|3.HP:0000006(常染色体显性遗传);HP:0000221(沟裂舌);HP:0000407(感音神经性耳聋);HP:0000495(复发性角膜糜烂);HP:0000535(眉毛稀疏);HP:0000559(角膜瘢痕);HP:000061…	M	5m	Highly suspicious variants associated with the disease phenotype
126	MYO15A	c.7396-1G>A	0	chr17-18054149	NM_016239	exon37	-	het	0.0003	Likely pathogenic	AR	unverified	常染色体隐性耳聋3型(OMIM:600316)	极重度感音神经性听力损失(HP:0011476)	F	3.7y	Highly suspicious variants associated with the disease phenotype
124	SLC26A4		0	chr7:107301080-107306560		exon1-3		hom		Pathogenic		unverified			M	7m	Highly suspicious variants associated with the disease phenotype
184	USH2A	c.11754G>A	0	chr1-215901684	NM_206933	exon61	p.W3918X	het		Pathogenic	1.AR|2.AR	unverified	1.视网膜色素变性39型(OMIM:613809)|2.Usher综合征IIA型(OMIM:276901)	1.视觉障碍(HP:0000505);视网膜色素变性(HP:0000510);视网膜电流图异常(HP:0000512);视野缺损(HP:0001123);骨细胞样色素沉着(HP:0007737);视网膜血管减少(HP:0007843)|2.视网膜色素变性(HP:0000510);先天性感音神经性听力障碍(HP:0008527)	F	3.1y	Highly suspicious variants associated with the disease phenotype
184	USH2A	c.9945C>A	0	chr1-215972262	NM_206933	exon50	p.Y3315X	het		Likely pathogenic	1.AR|2.AR	unverified	1.视网膜色素变性39型(OMIM:613809)|2.Usher综合征IIA型(OMIM:276901)	1.视觉障碍(HP:0000505);视网膜色素变性(HP:0000510);视网膜电流图异常(HP:0000512);视野缺损(HP:0001123);骨细胞样色素沉着(HP:0007737);视网膜血管减少(HP:0007843)|2.视网膜色素变性(HP:0000510);先天性感音神经性听力障碍(HP:0008527)	F	3.1y	Highly suspicious variants associated with the disease phenotype
184	USH2A	c.5608C>T	0	chr1-216246607	NM_206933	exon28	p.R1870W	het	0.0049	Likely pathogenic	1.AR|2.AR	unverified	1.视网膜色素变性39型(OMIM:613809)|2.Usher综合征IIA型(OMIM:276901)	1.视觉障碍(HP:0000505);视网膜色素变性(HP:0000510);视网膜电流图异常(HP:0000512);视野缺损(HP:0001123);骨细胞样色素沉着(HP:0007737);视网膜血管减少(HP:0007843)|2.视网膜色素变性(HP:0000510);先天性感音神经性听力障碍(HP:0008527)	F	3.1y	Highly suspicious variants associated with the disease phenotype
133	GJB2	c.235delC	0	chr13-20763485-20763486	NM_004004	exon2	p.L79Cfs*2	hom	0.005	Pathogenic	1.AD|2.AD|3.AD|4.AD|5.AD|6.AR|7.AD	unverified	1.高起样鱼鳞病伴耳聋(OMIM:602540)|2.常染色体显性耳聋3A型(OMIM:601544)|3.角膜炎-鱼鳞病-耳聋综合征(OMIM:148210)|4.残毁性掌跖角皮症(OMIM:124500)|5.Bart-Pumphrey综合征(OMIM:149200)|6.常染色体隐性耳聋1A型(OMIM:220290)|7.掌跖皮肤角化病伴耳聋(OMIM:148350)	1.感音神经性耳聋(HP:0000407);眉毛稀疏(HP:0000535);无睫毛(HP:0000561);睫毛稀疏(HP:0000653);掌跖角化症(HP:0000982);剥脱性皮炎(HP:0001019);高弓足(HP:0001761);鳞状细胞癌(HP:0002860);婴儿期发病(HP:0003593);头皮瘢痕性脱发(HP:0004552);鱼鳞病(HP:0008064);点状角膜炎(HP:0011859)|2.感音神经性耳聋(HP:0000407)|3.沟裂舌(HP:0000221);感音神经性耳聋(HP:0000407);复发性角膜糜烂(HP:0000495);眉毛稀疏(HP:0000535);角膜瘢痕(HP:0000559);畏光(HP:0000613);失明(HP:0000618);睫毛稀疏(HP:0000653);角化过度(HP:0000962);少汗症(HP:…	F	2.1y	Highly suspicious variants associated with the disease phenotype
139	MYO15A	c.5977C>T	0	chr17-18047041	NM_016239	exon26	p.R1993W	het	2e-05	Uncertain	AR	unverified	常染色体隐性耳聋3型(OMIM:600316)	极重度感音神经性听力损失(HP:0011476)	F	11m	Highly suspicious variants associated with the disease phenotype
140	LOXHD1	c.1777A>G	1	chr18-44159625	NM_144612	exon13	p.R593G	het		Uncertain	AR	unverified	常染色体隐性耳聋77型(OMIM:613079)	双侧感音神经性听觉障碍(HP:0008619)	F	6y	Highly suspicious variants associated with the disease phenotype
140	MITF	c.1177-1G>A	0	chr3-70013997	NM_001354605	exon10	splicing	het		Pathogenic	1.AD|2.AD|3.AD|4.-|5.AR	unverified	1.瓦登伯格综合征2A型(OMIM:193510)|2.双等位基因瓦登伯格综合征伴白化病(OMIM:103470)|3.Tietz白化病耳聋综合征(OMIM:103500)|4.皮肤恶性黑色素瘤易感8型(OMIM:614456)|5.COMMAND综合症(OMIM:617306)	1.鼻翼发育不全(HP:0000430);宽鼻梁(HP:0000431);一字眉(HP:0000664);白化病(HP:0001022);虹膜异色(HP:0001100);异质性的(HP:0001425);额发变白(HP:0002211);少白头(HP:0002216);白眉(HP:0002226);白色睫毛(HP:0002227);表现度差异(HP:0003828);白点病；斑驳病；斑状白斑病；斑状白癜风；斑状白化病；(HP:0007443);虹膜基质发育不全(HP:0007990);先天性感音神经性听力障碍(HP:0008527)|2.感音神经性耳聋(HP:0000407);斜视(HP:0000486);视觉障碍(HP:0000505);远视(HP:0000540);畏光(HP:0000613);眼球震颤(HP:0000639);多发性雀斑样痣(HP:0001003);皮肤色素减退(…	F	6y	Highly suspicious variants associated with the disease phenotype
173	MYO7A	c.617G>A	0	chr11-76867932	NM_000260	exon7	p.R206H	het	0.0019	Uncertain	1.AR|2.AD|3.AR	unverified	1.Usher综合征IB型(OMIM:276900)|2.常染色体显性耳聋11型(OMIM:601317)|3.常染色体隐性耳聋2型(OMIM:600060)	1.感音神经性耳聋(HP:0000407);视网膜色素变性(HP:0000510);视网膜电流图检测不到波形(HP:0000550);视力下降(HP:0000572);运动延迟(HP:0001270);异质性的(HP:0001425);前庭功能缺失(HP:0008555)|2.眩晕(HP:0002321);双侧感音神经性听觉障碍(HP:0008619)|3.感音神经性耳聋(HP:0000407);眩晕(HP:0002321);出生时发病(HP:0003577)	M	2y	Mutations that may be associated with disease but whose pathogenicity is unknown
173	MYO7A	c.1133G>A	0	chr11-76871261	NM_000260	exon11	p.R378H	het		Uncertain	1.AR|2.AD|3.AR	unverified	1.Usher综合征IB型(OMIM:276900)|2.常染色体显性耳聋11型(OMIM:601317)|3.常染色体隐性耳聋2型(OMIM:600060)	1.感音神经性耳聋(HP:0000407);视网膜色素变性(HP:0000510);视网膜电流图检测不到波形(HP:0000550);视力下降(HP:0000572);运动延迟(HP:0001270);异质性的(HP:0001425);前庭功能缺失(HP:0008555)|2.眩晕(HP:0002321);双侧感音神经性听觉障碍(HP:0008619)|3.感音神经性耳聋(HP:0000407);眩晕(HP:0002321);出生时发病(HP:0003577)	M	2y	Mutations that may be associated with disease but whose pathogenicity is unknown
144	PCDH15	c.398T>G	0	chr10-56128956	NM_033056	exon5	p.V133G	het		Uncertain	1.DR,AR|2.AR|3.AR	unverified	1.双基因Usher综合征ID/F型(OMIM:601067)|2.常染色体隐性耳聋23型(OMIM:609533)|3.Usher综合征IF型(OMIM:602083)	1.听力障碍(HP:0000365);视网膜色素变性(HP:0000510);前庭功能障碍(HP:0001751)|2.感音神经性耳聋(HP:0000407);婴儿期发病(HP:0003593)|3.视网膜色素变性(HP:0000510);运动延迟(HP:0001270);先天性感音神经性听力障碍(HP:0008527)	M	2.5y	Highly suspicious variants associated with the disease phenotype
164	MYO15A	c.4898T>C	0	chr17-18041451	NM_016239	exon16	p.I1633T	het	0.0002	Likely pathogenic	AR	unverified	常染色体隐性耳聋3型(OMIM:600316)	极重度感音神经性听力损失(HP:0011476)	F	4.6y	Highly suspicious variants associated with the disease phenotype
155	POU3F4	c.126C>A	0	chrX-82763458	NM_000307	exon1	p.Y42X	hemi		Likely pathogenic	XLR	unverified	X连锁耳聋2型(OMIM:304400)	镫骨固定(HP:0000381);传导性听力障碍(HP:0000405);渐进性感音神经性听力损失(HP:0000408);X-连锁隐性遗传(HP:0001419);内听道扩大(HP:0004458)	M	5.7y	Highly suspicious variants associated with the disease phenotype
154	PTPRQ	c.6087-3T>G	0	chr12-81066945	NM_001145026	exon40	splicing	het		Uncertain	1.AR|2.AD	unverified	1.常染色体隐性耳聋84A型(OMIM:613391)|2.常染色体显性耳聋73型(OMIM:617663)	1.听力障碍(HP:0000365);运动延迟(HP:0001270);前庭功能障碍(HP:0001751);婴儿期发病(HP:0003593)|2.-	F	7y	Highly suspicious variants associated with the disease phenotype
151	ECM1	c.130G>A	1	chr1-150482145	NM_004425	exon3	p.A44T	het	0.0078	Uncertain	AR	unverified	Urbach-Wiethe类脂蛋白沉积病(OMIM:247100)	攻击性行为(HP:0000718);幻觉(HP:0000738);皮肤异常(HP:0000951);癫痫发作(HP:0001250);声音嘶哑(HP:0001609);片形脱发，鬼剃头(HP:0002232);记忆障碍(HP:0002354);双侧颅内钙化(HP:0005671);偏执狂(HP:0011999)	F	27y	Highly suspicious variants associated with the disease phenotype
168	CHD7	c.2540delA	0	chr8-61728986-61728987	NM_017780	exon8	p.D849Ifs*38	het		Pathogenic	1.AD|2.AD	de novo	1.CHARGE综合征(OMIM:214800)|2.Kallmann综合征5型(OMIM:612370)	1.隐睾(HP:0000028);低促性腺素性性腺功能减退症(HP:0000044);小阴茎(HP:0000054);阴唇发育不良(HP:0000066);马蹄肾(HP:0000085);肾发育不良(HP:0000089);肾缺如(HP:0000104);肾积水(HP:0000126);腭裂(HP:0000175);上唇裂(HP:0000204);小头畸形(HP:0000252);平颧骨(HP:0000272);眼距过宽(HP:0000316);方脸(HP:0000321);面部不对称(HP:0000324);小下颌畸形(HP:0000347);杯状耳(HP:0000378);罗布泊耳(HP:0000394);混合性听力损失(HP:0000410);鼻后孔闭锁(HP:0000453);嗅觉丧失(HP:0000458);颈蹼(HP:0000465);视网膜缺损(HP:0000480);下斜…	M	1.5y	Highly suspicious variants associated with the disease phenotype
176	SLC26A4	c.919-2A>G	0	chr7-107323898	NM_000441	exon8	splicing	hom	0.0043	Pathogenic	1.AR|2.AR	unverified	1.常染色体隐性耳聋4型伴前庭导水管扩大(OMIM:600791)|2.Pendred综合征(OMIM:274600)	1.II型耳蜗分隔不全(HP:0000376);感音神经性耳聋(HP:0000407);前庭导水管扩大(HP:0011387)|2.甲状腺肿(HP:0000853);智力残疾(HP:0001249);前庭功能障碍(HP:0001751);代谢紊乱/稳态失衡(HP:0001939);甲状腺癌(HP:0002890);代偿性甲状腺功能减退症(HP:0008223);先天性感音神经性听力障碍(HP:0008527);耳蜗畸形(HP:0008554)	F	9m	Highly suspicious variants associated with the disease phenotype
171	GJB2	c.257C>G	0	chr13-20763464	NM_004004	exon2	p.T86R	het		Likely pathogenic	1.AD|2.AD|3.AD|4.AD|5.AD|6.AR|7.AD	unverified	1.高起样鱼鳞病伴耳聋(OMIM:602540)|2.常染色体显性耳聋3A型(OMIM:601544)|3.角膜炎-鱼鳞病-耳聋综合征(OMIM:148210)|4.残毁性掌跖角皮症(OMIM:124500)|5.Bart-Pumphrey综合征(OMIM:149200)|6.常染色体隐性耳聋1A型(OMIM:220290)|7.掌跖皮肤角化病伴耳聋(OMIM:148350)	1.感音神经性耳聋(HP:0000407);眉毛稀疏(HP:0000535);无睫毛(HP:0000561);睫毛稀疏(HP:0000653);掌跖角化症(HP:0000982);剥脱性皮炎(HP:0001019);高弓足(HP:0001761);鳞状细胞癌(HP:0002860);婴儿期发病(HP:0003593);头皮瘢痕性脱发(HP:0004552);鱼鳞病(HP:0008064);点状角膜炎(HP:0011859)|2.感音神经性耳聋(HP:0000407)|3.沟裂舌(HP:0000221);感音神经性耳聋(HP:0000407);复发性角膜糜烂(HP:0000495);眉毛稀疏(HP:0000535);角膜瘢痕(HP:0000559);畏光(HP:0000613);失明(HP:0000618);睫毛稀疏(HP:0000653);角化过度(HP:0000962);少汗症(HP:…	F	2.5m	Highly suspicious variants associated with the disease phenotype
171	GJB2	c.235delC	0	chr13-20763485-20763486	NM_004004	exon2	p.L79Cfs*2	het	0.005	Pathogenic	1.AD|2.AD|3.AD|4.AD|5.AD|6.AR|7.AD	unverified	1.高起样鱼鳞病伴耳聋(OMIM:602540)|2.常染色体显性耳聋3A型(OMIM:601544)|3.角膜炎-鱼鳞病-耳聋综合征(OMIM:148210)|4.残毁性掌跖角皮症(OMIM:124500)|5.Bart-Pumphrey综合征(OMIM:149200)|6.常染色体隐性耳聋1A型(OMIM:220290)|7.掌跖皮肤角化病伴耳聋(OMIM:148350)	1.感音神经性耳聋(HP:0000407);眉毛稀疏(HP:0000535);无睫毛(HP:0000561);睫毛稀疏(HP:0000653);掌跖角化症(HP:0000982);剥脱性皮炎(HP:0001019);高弓足(HP:0001761);鳞状细胞癌(HP:0002860);婴儿期发病(HP:0003593);头皮瘢痕性脱发(HP:0004552);鱼鳞病(HP:0008064);点状角膜炎(HP:0011859)|2.感音神经性耳聋(HP:0000407)|3.沟裂舌(HP:0000221);感音神经性耳聋(HP:0000407);复发性角膜糜烂(HP:0000495);眉毛稀疏(HP:0000535);角膜瘢痕(HP:0000559);畏光(HP:0000613);失明(HP:0000618);睫毛稀疏(HP:0000653);角化过度(HP:0000962);少汗症(HP:…	F	2.5m	Highly suspicious variants associated with the disease phenotype
167	GJB2	c.235delC	0	chr13-20763485-20763486	NM_004004	exon2	p.L79Cfs*2	het	0.005	Pathogenic	1.AD|2.AD|3.AD|4.AD|5.AD|6.AR|7.AD	unverified	1.高起样鱼鳞病伴耳聋(OMIM:602540)|2.常染色体显性耳聋3A型(OMIM:601544)|3.角膜炎-鱼鳞病-耳聋综合征(OMIM:148210)|4.残毁性掌跖角皮症(OMIM:124500)|5.Bart-Pumphrey综合征(OMIM:149200)|6.常染色体隐性耳聋1A型(OMIM:220290)|7.掌跖皮肤角化病伴耳聋(OMIM:148350)	1.感音神经性耳聋(HP:0000407);眉毛稀疏(HP:0000535);无睫毛(HP:0000561);睫毛稀疏(HP:0000653);掌跖角化症(HP:0000982);剥脱性皮炎(HP:0001019);高弓足(HP:0001761);鳞状细胞癌(HP:0002860);婴儿期发病(HP:0003593);头皮瘢痕性脱发(HP:0004552);鱼鳞病(HP:0008064);点状角膜炎(HP:0011859)|2.感音神经性耳聋(HP:0000407)|3.沟裂舌(HP:0000221);感音神经性耳聋(HP:0000407);复发性角膜糜烂(HP:0000495);眉毛稀疏(HP:0000535);角膜瘢痕(HP:0000559);畏光(HP:0000613);失明(HP:0000618);睫毛稀疏(HP:0000653);角化过度(HP:0000962);少汗症(HP:…	M	5m	Mutations that may be associated with disease but whose pathogenicity is unknown
167	GJB2	c.109G>A	0	chr13-20763612	NM_004004	exon2	p.V37I	het	0.0724	Uncertain	1.AD|2.AD|3.AD|4.AD|5.AD|6.AR|7.AD	unverified	1.高起样鱼鳞病伴耳聋(OMIM:602540)|2.常染色体显性耳聋3A型(OMIM:601544)|3.角膜炎-鱼鳞病-耳聋综合征(OMIM:148210)|4.残毁性掌跖角皮症(OMIM:124500)|5.Bart-Pumphrey综合征(OMIM:149200)|6.常染色体隐性耳聋1A型(OMIM:220290)|7.掌跖皮肤角化病伴耳聋(OMIM:148350)	1.感音神经性耳聋(HP:0000407);眉毛稀疏(HP:0000535);无睫毛(HP:0000561);睫毛稀疏(HP:0000653);掌跖角化症(HP:0000982);剥脱性皮炎(HP:0001019);高弓足(HP:0001761);鳞状细胞癌(HP:0002860);婴儿期发病(HP:0003593);头皮瘢痕性脱发(HP:0004552);鱼鳞病(HP:0008064);点状角膜炎(HP:0011859)|2.感音神经性耳聋(HP:0000407)|3.沟裂舌(HP:0000221);感音神经性耳聋(HP:0000407);复发性角膜糜烂(HP:0000495);眉毛稀疏(HP:0000535);角膜瘢痕(HP:0000559);畏光(HP:0000613);失明(HP:0000618);睫毛稀疏(HP:0000653);角化过度(HP:0000962);少汗症(HP:…	M	5m	Mutations that may be associated with disease but whose pathogenicity is unknown
167	SLC17A8	c.1120G>T	1	chr12-100797882	NM_139319	exon9	p.A374S	het	0.0049	Uncertain	AD	unverified	常染色体显性耳聋25型(OMIM:605583)	感音神经性耳聋(HP:0000407);表现度差异(HP:0003828)	M	5m	Mutations that may be associated with disease but whose pathogenicity is unknown
167	RPGR	c.2200G>A	1	chrX-38146052	NM_001034853	exon15	p.E734K	hemi	0.0003	Uncertain	1.XL|2.XL|3.XLR|4.XL	unverified	1.视网膜色素变性3型(OMIM:300029)|2.X连锁视锥-视杆营养不良1型(OMIM:304020)|3.X连锁黄斑变性萎缩症(OMIM:300834)|4.视网膜色素变性和呼吸道感染伴或无耳聋(OMIM:300455)	1.视网膜色素变性(HP:0000510);锥杆营养不良(HP:0000548);X-连锁遗传(HP:0001417)|2.视觉障碍(HP:0000505);近视(HP:0000545);锥杆营养不良(HP:0000548);畏光(HP:0000613);眼球震颤(HP:0000639);代谢紊乱/稳态失衡(HP:0001939);中心视力下降(HP:0007663);视锥细胞失功能(HP:0030637);黄斑瘢痕(HP:0200056)|3.黄斑变性(HP:0000608);X-连锁隐性遗传(HP:0001419);中心视力下降(HP:0007663)|4.中耳炎(HP:0000388);视网膜色素变性(HP:0000510);X-连锁隐性遗传(HP:0001419);复发性支气管炎(HP:0002837);高频听力障碍(HP:0005101);反复流感嗜血杆菌感染(HP:00053…	M	5m	Mutations that may be associated with disease but whose pathogenicity is unknown
169	GJB2	c.109G>A	0	chr13-20763612	NM_004004	exon2	p.V37I	het	0.0724	Uncertain	1.AD|2.AD|3.AD|4.AD|5.AD|6.AR|7.AD	Maternal	1.高起样鱼鳞病伴耳聋(OMIM:602540)|2.常染色体显性耳聋3A型(OMIM:601544)|3.角膜炎-鱼鳞病-耳聋综合征(OMIM:148210)|4.残毁性掌跖角皮症(OMIM:124500)|5.Bart-Pumphrey综合征(OMIM:149200)|6.常染色体隐性耳聋1A型(OMIM:220290)|7.掌跖皮肤角化病伴耳聋(OMIM:148350)	1.感音神经性耳聋(HP:0000407);眉毛稀疏(HP:0000535);无睫毛(HP:0000561);睫毛稀疏(HP:0000653);掌跖角化症(HP:0000982);剥脱性皮炎(HP:0001019);高弓足(HP:0001761);鳞状细胞癌(HP:0002860);婴儿期发病(HP:0003593);头皮瘢痕性脱发(HP:0004552);鱼鳞病(HP:0008064);点状角膜炎(HP:0011859)|2.感音神经性耳聋(HP:0000407)|3.沟裂舌(HP:0000221);感音神经性耳聋(HP:0000407);复发性角膜糜烂(HP:0000495);眉毛稀疏(HP:0000535);角膜瘢痕(HP:0000559);畏光(HP:0000613);失明(HP:0000618);睫毛稀疏(HP:0000653);角化过度(HP:0000962);少汗症(HP:…	F	6m	Mutations that may be associated with disease but whose pathogenicity is unknown
169	GJB2	c.235delC		chr13- 20763485- 20763486	NM_004004	exon2	p.L79Cfs *2	het		Pathogenic		Paternal			F	6m
175	CHD7	c.3202-3T>G	0	chr8-61736396	NM_017780	exon13	splicing	het		Pathogenic	1.AD|2.AD	de novo	1.CHARGE综合征(OMIM:214800)|2.Kallmann综合征5型(OMIM:612370)	1.隐睾(HP:0000028);低促性腺素性性腺功能减退症(HP:0000044);小阴茎(HP:0000054);阴唇发育不良(HP:0000066);马蹄肾(HP:0000085);肾发育不良(HP:0000089);肾缺如(HP:0000104);肾积水(HP:0000126);腭裂(HP:0000175);上唇裂(HP:0000204);小头畸形(HP:0000252);平颧骨(HP:0000272);眼距过宽(HP:0000316);方脸(HP:0000321);面部不对称(HP:0000324);小下颌畸形(HP:0000347);杯状耳(HP:0000378);罗布泊耳(HP:0000394);混合性听力损失(HP:0000410);鼻后孔闭锁(HP:0000453);嗅觉丧失(HP:0000458);颈蹼(HP:0000465);视网膜缺损(HP:0000480);下斜…	M	4m	Highly suspicious variants associated with the disease phenotype
175	PGK1	c.506C>T	1	chrX-77372897	NM_000291	exon5	p.A169V	hemi	0.0003	Uncertain	XLR	Maternal	磷酸甘油酸激酶缺乏症(OMIM:300653)	肾功能不全(HP:0000083);视网膜营养不良(HP:0000556);视力下降(HP:0000572);情绪不稳(HP:0000712);语言发育迟缓(HP:0000750);智力残疾(HP:0001249);癫痫发作(HP:0001250);共济失调(HP:0001251);全面发育迟缓(HP:0001263);X-连锁隐性遗传(HP:0001419);溶血性贫血(HP:0001878);网状细胞过多(HP:0001923);偏头痛(HP:0002076);肌病(HP:0003198);横纹肌溶解症(HP:0003201);运动不耐受(HP:0003546);运动引起的肌肉痉挛(HP:0003710);表型多样性(HP:0003812);运动后肌红蛋白尿症(HP:0008305)	M	4m	Highly suspicious variants associated with the disease phenotype
175	TNC	c.6401C>G	1	chr9-117786346	NM_002160	exon27	p.T2134S	het		Uncertain	AD	Maternal	常染色体显性耳聋56型(OMIM:615629)	听力障碍(HP:0000365)	M	4m	Highly suspicious variants associated with the disease phenotype
175	TRIOBP	c.965C>T	1	chr22-38119528	NM_001039141	exon7	p.A322V	het	0.0048	Uncertain	AR	Paternal	常染色体隐性耳聋28型(OMIM:609823)	婴儿期发病(HP:0003593);重度感音神经性耳聋(HP:0008625)	M	4m	Highly suspicious variants associated with the disease phenotype
175	TRIOBP	c.4484A>T	1	chr22-38130827	NM_001039141	exon9	p.E1495V	het	0.0102	Uncertain	AR	Maternal	常染色体隐性耳聋28型(OMIM:609823)	婴儿期发病(HP:0003593);重度感音神经性耳聋(HP:0008625)	M	4m	Highly suspicious variants associated with the disease phenotype
178	KCNQ4	c.2014G>A	1	chr1-41304121	NM_004700	exon14	p.V672M	het	0.0008	Uncertain	AD	unverified	常染色体显性耳聋2A型(OMIM:600101)	耳鸣(HP:0000360);听力障碍(HP:0000365);进行性/渐进性(HP:0003676)	M	4m	Highly suspicious variants associated with the disease phenotype
181	SLC26A4	c.919-2A>G	0	chr7-107323898	NM_000441	exon8	splicing	hom	0.0043	Pathogenic	1.AR|2.AR	unverified	1.常染色体隐性耳聋4型伴前庭导水管扩大(OMIM:600791)|2.Pendred综合征(OMIM:274600)	1.II型耳蜗分隔不全(HP:0000376);感音神经性耳聋(HP:0000407);前庭导水管扩大(HP:0011387)|2.甲状腺肿(HP:0000853);智力残疾(HP:0001249);前庭功能障碍(HP:0001751);代谢紊乱/稳态失衡(HP:0001939);甲状腺癌(HP:0002890);代偿性甲状腺功能减退症(HP:0008223);先天性感音神经性听力障碍(HP:0008527);耳蜗畸形(HP:0008554)	F	3y	Highly suspicious variants associated with the disease phenotype
191	OTOGL	c.141+1G>A	0	chr12-80605778	NM_173591	exon3	splicing	het		Pathogenic	AR	unverified	常染色体隐性耳聋84B型(OMIM:614944)	听力障碍(HP:0000365);前庭功能减退(HP:0001756)	F	5.8y	Highly suspicious variants associated with the disease phenotype
191	OTOGL	c.6409G>T	0	chr12-80761445	NM_173591	exon53	p.E2137X	het		Pathogenic	AR	unverified	常染色体隐性耳聋84B型(OMIM:614944)	听力障碍(HP:0000365);前庭功能减退(HP:0001756)	F	5.8y	Highly suspicious variants associated with the disease phenotype
203	TMPRSS3	c.916G>A	0	chr21:43802210	NM_024022	exon9	p.A306T	het	0.001	Likely pathogenic	AR	Maternal	常染色体隐性耳聋8&10型	感音神经性耳聋;儿童期发病	F	6m	Suspected variations associated with disease phenotypes
203	TMPRSS3	c.646C>T	0	chr21:43803278	NM_024022	exon8	p.R216C	het	0.0001	Likely pathogenic	AR	Paternal	常染色体隐性耳聋8&10型	感音神经性耳聋;儿童期发病	F	6m	Suspected variations associated with disease phenotypes
202	GJB2	c.571T>C	0	chr13:20763150	NM_004004	exon2	p.F191L	het	0.0021	Likely pathogenic	AD|AD|AD|AD|AD|AD|AR	Paternal	高起样鱼鳞病伴耳聋|常染色体显性耳聋3A型|角膜炎-鱼鳞病-耳聋综合征|残毁性掌跖角皮症|Bart-Pumphrey综合征|掌跖皮肤角化病伴耳聋|常染色体隐性耳聋1A型	感音神经性耳聋;眉毛稀疏;睫毛缺失;睫毛稀疏;掌跖角化症;剥脱性皮炎;高弓足;鳞状细胞癌;婴儿期发病;头皮瘢痕性脱发;鱼鳞病;点状角膜炎|感音神经性耳聋|沟裂舌;感音神经性耳聋;复发性角膜糜烂;眉毛稀疏;角膜瘢痕;畏光;失明;睫毛稀疏;角化过度;少汗症;干燥性角结膜炎;倒睫;高弓足;指甲发育不良;口腔白斑;鳞状细胞癌;肘屈曲挛缩;复发性细菌性皮肤感染;膝关节屈曲挛缩;鱼鳞病;甲营养不良;角膜基质异常;角膜溃疡|听力障碍;手的自发性离断;蜂窝状掌跖角化;羊膜带狭窄环|听力障碍;白甲|听力障碍;掌跖角化|感音神经性耳聋;前庭功能障碍;双基因遗传	F	6m	Highly suspicious variants associated with the disease phenotype
202	GJB2	c.109G>A	0	chr13:20763612	NM_004004	exon2	p.V37I	het	0.0944	Pathogenic	AD|AD|AD|AD|AD|AD|AR	Maternal	高起样鱼鳞病伴耳聋|常染色体显性耳聋3A型|角膜炎-鱼鳞病-耳聋综合征|残毁性掌跖角皮症|Bart-Pumphrey综合征|掌跖皮肤角化病伴耳聋|常染色体隐性耳聋1A型	感音神经性耳聋;眉毛稀疏;睫毛缺失;睫毛稀疏;掌跖角化症;剥脱性皮炎;高弓足;鳞状细胞癌;婴儿期发病;头皮瘢痕性脱发;鱼鳞病;点状角膜炎|感音神经性耳聋|沟裂舌;感音神经性耳聋;复发性角膜糜烂;眉毛稀疏;角膜瘢痕;畏光;失明;睫毛稀疏;角化过度;少汗症;干燥性角结膜炎;倒睫;高弓足;指甲发育不良;口腔白斑;鳞状细胞癌;肘屈曲挛缩;复发性细菌性皮肤感染;膝关节屈曲挛缩;鱼鳞病;甲营养不良;角膜基质异常;角膜溃疡|听力障碍;手的自发性离断;蜂窝状掌跖角化;羊膜带狭窄环|听力障碍;白甲|听力障碍;掌跖角化|感音神经性耳聋;前庭功能障碍;双基因遗传	F	6m	Highly suspicious variants associated with the disease phenotype
204	TECTA		0			23		纯合缺失		Likely pathogenic		unverified			M	4.5y	Suspected variations associated with disease phenotypes
195	GJB2	c.109G>A	0	chr13:20763612	NM_004004	exon2	p.V37I	hom	0.0724	Uncertain	AD|AD|AD|AD|AD|AR|AD	parent	高起样鱼鳞病伴耳聋|常染色体显性耳聋3A型|角膜炎-鱼鳞病-耳聋综合征|残毁性掌跖角皮症|Bart-Pumphrey综合征|常染色体隐性耳聋1A型|掌跖皮肤角化病伴耳聋	感音神经性耳聋;眉毛稀疏;无睫毛;睫毛稀疏;掌跖角化症;剥脱性皮炎;高弓足;鳞状细胞癌;婴儿期发病;头皮瘢痕性脱发;鱼鳞病;点状角膜炎|感音神经性耳聋|沟裂舌;感音神经性耳聋;复发性角膜糜烂;眉毛稀疏;角膜瘢痕;畏光;失明;睫毛稀疏;角化过度;少汗症;干燥性角结膜炎;倒睫;高弓足;甲发育不良;口腔白斑;鳞状细胞癌;肘屈曲挛缩;复发性细菌性皮肤感染;膝关节屈曲挛缩;鱼鳞病;甲营养不良;角膜基质异常;角膜溃疡|听力障碍;手的自发性离断;蜂窝状掌跖角化;羊膜带狭窄环|听力障碍;白甲|感音神经性耳聋;前庭功能障碍;双基因遗传|听力障碍;掌跖角化	F	11m	Mutations that may be associated with disease but whose pathogenicity is unknown
197	GJB2	c.235delC	0	chr13:20763485-20763486	NM_004004	exon2	p.L79Cfs*3	hom	0.0092	Pathogenic	AD|AD|AD|AD|AD|AR|AD	parent	高起样鱼鳞病伴耳聋|常染色体显性耳聋3A型|角膜炎-鱼鳞病-耳聋综合征|残毁性掌跖角皮症|Bart-Pumphrey综合征|常染色体隐性耳聋1A型|掌跖皮肤角化病伴耳聋	感音神经性耳聋;眉毛稀疏;无睫毛;睫毛稀疏;掌跖角化症;剥脱性皮炎;高弓足;鳞状细胞癌;婴儿期发病;头皮瘢痕性脱发;鱼鳞病;点状角膜炎|感音神经性耳聋|沟裂舌;感音神经性耳聋;复发性角膜糜烂;眉毛稀疏;角膜瘢痕;畏光;失明;睫毛稀疏;角化过度;少汗症;干燥性角结膜炎;倒睫;高弓足;甲发育不良;口腔白斑;鳞状细胞癌;肘屈曲挛缩;复发性细菌性皮肤感染;膝关节屈曲挛缩;鱼鳞病;甲营养不良;角膜基质异常;角膜溃疡|听力障碍;手的自发性离断;蜂窝状掌跖角化;羊膜带狭窄环|听力障碍;白甲|感音神经性耳聋;前庭功能障碍;双基因遗传|听力障碍;掌跖角化	F	7y	Highly suspicious variants associated with the disease phenotype
198	WFS1	c.977C>T	1	chr4:6302499	NM_006005	exon8	p.A326V	het	7.7e-05	Uncertain	AD|AD|AD|AR|AD	Paternal	常染色体显性耳聋6型|常染色体显性遗传Wolfram样综合征|白内障41型|Wolfram综合征1型|{非胰岛素依赖性糖尿病}	渐进性感音神经性听力损失;低频感音神经性听力障碍|听力障碍;青光眼;视神经萎缩;精神病;抑郁;孤独症;幻觉;焦虑;糖尿病;葡萄糖不耐受;精神分裂症|先天性白内障;核性白内障|神经源性膀胱功能障碍;睾丸萎缩;输尿管积水;肾积水;感音神经性耳聋;上睑下垂;色素性视网膜病;眼球震颤;视神经萎缩;行为异常;糖尿病;甲状腺功能减退症;尿崩症;智力残疾;癫痫发作;共济失调;构音障碍;震颤;生长延迟;心肌病;血小板减少症;巨幼细胞性贫血;铁粒幼细胞性贫血;吞咽困难;脑萎缩;卒中样发作;近端指间关节活动受限|胰岛素抵抗;2型糖尿病	M	5m	Highly suspicious variants associated with the disease phenotype
198	MPZL2	c.220C>T	0	chr11:118133651	NM_005797	exon2	p.Q74X	hom	0.0062	Pathogenic	AR	parent	常染色体隐性遗传的耳聋11型	-	M	5m	Highly suspicious variants associated with the disease phenotype
205	GJB2	c.235delC	0	chr13:20763485-20763486	NM_004004	exon2	p.L79Cfs*3	hom	0.0102564	Pathogenic	AD|AR|AD|AD|AD|AD|AD	parent	掌跖皮肤角化病伴耳聋|常染色体隐性耳聋1A型|残毁性掌跖角皮症|角膜炎-鱼鳞病-耳聋综合征|常染色体显性耳聋3A型|高起样鱼鳞病伴耳聋|BART-PUMPHREY综合症	听力障碍;掌跖角化|感音神经性耳聋;前庭功能障碍|听力障碍;手的自发性离断;蜂窝状掌跖角化;羊膜带狭窄环|沟裂舌;感音神经性耳聋;复发性角膜糜烂;眉毛稀疏;角膜瘢痕;畏光;失明;睫毛稀疏;角化过度;少汗症;干燥性角结膜炎;倒睫;高弓足;指甲发育不良;口腔白斑;鳞状细胞癌;肘屈曲挛缩;复发性细菌性皮肤感染;膝关节屈曲挛缩;鱼鳞病;甲营养不良;角膜基质异常;角膜溃疡|感音神经性耳聋|感音神经性耳聋;眉毛稀疏;睫毛缺失;睫毛稀疏;掌跖角化症;剥脱性皮炎;高弓足;鳞状细胞癌;婴儿期发病;头皮瘢痕性脱发;鱼鳞病;点状角膜炎|听力障碍;白甲	M	2y	Highly suspicious variants associated with the disease phenotype
207	SIX1	c.742C>T	1	chr14:61113114	NM_005982	exon2	p.L248F	het		Uncertain	AD|AD	Maternal	常染色体显性耳聋23型|鳃裂-耳综合征3型	膀胱输尿管返流;传导性听力障碍;感音神经性耳聋;耳前凹陷|耳前皮赘;感音神经性耳聋;口角小窝;耳前凹陷;泪道狭窄;鳃裂囊肿	F	3.2y	Highly suspicious variants associated with the disease phenotype
207	MYO15A	c.4898T>C	0	chr17:18041451	NM_016239	exon16	p.I1633T	het	0.000199681	Uncertain	AR	Paternal	常染色体隐性耳聋3型	极重度感音神经性听力损失	F	3.2y	Highly suspicious variants associated with the disease phenotype
207	MYO15A	c.9534dupC	0	chr17:18065915-18065915	NM_016239	exon57	p.E3179Rfs*43	het		Likely pathogenic	AR	Maternal	常染色体隐性耳聋3型	极重度感音神经性听力损失	F	3.2y	Highly suspicious variants associated with the disease phenotype
209	SLC26A4	c.919-2A>G	0	chr7:107323898	NM_000441	exon8		het	0.00833333	Pathogenic	AR|AR	Paternal	Pendred综合征|常染色体隐性耳聋4型伴前庭导水管扩大	甲状腺肿;智力缺陷;前庭功能障碍;代谢紊乱/稳态失衡;甲状腺癌;代偿性甲状腺功能减退症;先天性感音神经性听力障碍;耳蜗畸形|II型耳蜗分隔不全;感音神经性耳聋;前庭导水管扩大	F	1.5y	Highly suspicious variants associated with the disease phenotype
209	SLC26A4	c.1949T>A	0	chr7:107342417	NM_000441	exon17	p.V650D	het		Likely pathogenic	AR|AR	Maternal	Pendred综合征|常染色体隐性耳聋4型伴前庭导水管扩大	甲状腺肿;智力缺陷;前庭功能障碍;代谢紊乱/稳态失衡;甲状腺癌;代偿性甲状腺功能减退症;先天性感音神经性听力障碍;耳蜗畸形|II型耳蜗分隔不全;感音神经性耳聋;前庭导水管扩大	F	1.5y	Highly suspicious variants associated with the disease phenotype
211	GJB2	c.235delC	0	chr13:20763485-20763486	NM_004004	exon2	p.L79Cfs*3	hom	0.0102564	Pathogenic	AD|AD|AD|AD|AD|AR,DD|AD	parent	掌跖皮肤角化病伴耳聋|残毁性掌跖角皮症|角膜炎-鱼鳞病-耳聋综合征|常染色体显性耳聋3A型|高起样鱼鳞病伴耳聋|常染色体隐性耳聋1A型|BART-PUMPHREY综合症	听力障碍;掌跖角化|听力障碍;手的自发性离断;蜂窝状掌跖角化;羊膜带狭窄环;儿童期发病;关节垫|沟裂舌;感音神经性耳聋;复发性角膜糜烂;眉毛稀疏;角膜瘢痕;畏光;失明;睫毛稀疏;角化过度;少汗症;干燥性角结膜炎;倒睫;高弓足;指甲发育不良;口腔白斑;鳞状细胞癌;肘屈曲挛缩;复发性细菌性皮肤感染;膝关节屈曲挛缩;鱼鳞病;甲营养不良;角膜基质异常;角膜溃疡|感音神经性耳聋|感音神经性耳聋;眉毛稀疏;睫毛缺失;睫毛稀疏;掌跖角化症;剥脱性皮炎;高弓足;鳞状细胞癌;婴儿期发病;头皮瘢痕性脱发;鱼鳞病;点状角膜炎|感音神经性耳聋;前庭功能障碍;双基因遗传|听力障碍;白甲	F	7y	Highly suspicious variants associated with the disease phenotype
212	MFN2	c.526G>A	0	chr1:12057405	NM_014874.4	exon6	p.Gly176Ser	het		Likely pathogenic	AD|AD|AR	Maternal	Charcot-Marie-Tooth病2A2A型|遗传性运动感觉神经病6A型|Charcot-Marie-Tooth病,轴突,2A2B型	听力障碍;视神经萎缩;痉挛;腱反射减弱;智能衰退;肌张力增高;神经反射消失;震颤;反射亢进;屈曲挛缩;高弓足;槌状趾;远端肌无力;脊柱侧弯/脊柱侧凸;远端感觉障碍;跨阈步态;轴索变性/再生;周围有髓鞘神经纤维数量减少;洋葱鳞茎形成;外围轴突萎缩;运动神经传导速度降低;巴彬斯基征;进程缓慢;四肢肌肉无力;远端肌肉萎缩;表现度差异;外显不全;足背屈无力;疼痛;感觉神经传导速度降低|耳鸣;嗅觉丧失;视盘苍白;色觉异常;中心暗点;Dysmetric 扫视;视神经萎缩;视觉诱发电位异常;腱反射减弱;神经反射消失;声带麻痹性轻瘫;高弓足;闭目难立征阳性;远端肌无力;脊柱侧弯/脊柱侧凸;远端感觉障碍;腰椎前凸过度;跨阈步态;轴索变性/再生;远端各种感觉障碍;运动神经传导速度降低;婴儿期发病;四肢肌肉无力;远端肌肉萎缩;近端肌肉无力;视力缓慢下降;轻度感音神经性听力损失|听力障碍;视盘苍白;视神经萎缩;…	M	3.8y	Highly suspicious variants associated with the disease phenotype
212	GATA3	c.282dup	1	chr10:8100308-8100308	NM_001002295.2	exon3	p.Pro95ThrfsTer209	het		Pathogenic	AD	de novo	甲状旁腺功能减退、感觉神经性耳聋及肾病	肾病综合征;肾发育不良;感音神经性耳聋;甲状旁腺功能减退症;阴道纵膈;双子宫;肾小球基底膜增厚;慢性肾病;蛋白尿;血尿;肾钙质沉着症;远端肾小管性酸中毒;近端肾小管酸中毒;上睑下垂;手足抽搐;子宫发育不全;水平眼震;原发性闭经;阴道发育不全;单侧肾发育不良;基底节钙化;假性视乳头水肿	M	3.8y	Highly suspicious variants associated with the disease phenotype
213	GJB2	c.109G>A	0	chr13:20763612	NM_004004.6	exon2	p.Val37Ile	hom	0.0917843	Pathogenic	AD|AD|AD|AD|AD|AR,DD|AD	parent	掌跖皮肤角化病伴耳聋|残毁性掌跖角皮症|角膜炎-鱼鳞病-耳聋综合征|常染色体显性耳聋3A型|高起样鱼鳞病伴耳聋|常染色体隐性耳聋1A型|BART-PUMPHREY综合症	听力障碍;掌跖角化|听力障碍;手的自发性离断;蜂窝状掌跖角化;羊膜带狭窄环;儿童期发病;关节垫|沟裂舌;感音神经性耳聋;复发性角膜糜烂;眉毛稀疏;角膜瘢痕;畏光;失明;睫毛稀疏;角化过度;少汗症;干燥性角结膜炎;倒睫;高弓足;指甲发育不良;口腔白斑;鳞状细胞癌;肘屈曲挛缩;复发性细菌性皮肤感染;膝关节屈曲挛缩;鱼鳞病;甲营养不良;角膜基质异常;角膜溃疡|感音神经性耳聋|感音神经性耳聋;眉毛稀疏;睫毛缺失;睫毛稀疏;掌跖角化症;剥脱性皮炎;高弓足;鳞状细胞癌;婴儿期发病;头皮瘢痕性脱发;鱼鳞病;点状角膜炎|感音神经性耳聋;前庭功能障碍;双基因遗传|听力障碍;白甲	M	1.6y	Highly suspicious variants associated with the disease phenotype
215	KCNQ4	c.827G>T	0	chr1:41285137	NM_004700.4	exon5	p.Trp276Leu	het		Pathogenic	AD	Paternal	常染色体显性耳聋2A型	耳鸣;听力障碍;进行性/渐进性	M	10m	Highly suspicious variants associated with the disease phenotype
215	TRIO	c.5063G>A	1	chr5:14419990	NM_007118.4	exon34	p.Arg1688Gln	het	8.292e-06	Uncertain	AD|AD	Paternal	常染色体显性智力发育障碍63型伴巨头畸形;MRD63|常染色体显性遗传智力发育障碍44型伴小头畸形(MRD44)	智力迟钝;全面发育迟缓;运动迟缓;言语障碍;语言表达中度发育延迟;长人中;鼻小柱下垂;额隆起;对耳轮突出;语言发育迟缓;攻击性行为;短下巴;鼻翼发育不全;鼻梁凹陷;婴儿期喂养困难;鼻孔前翻;锥形指;智力缺陷;延迟行走能力;高拱形眉毛;刻板行为;宽嘴;小头畸形;高腭;巨头畸形;慢性便秘;牙齿排列过挤;睑裂上斜;独坐能力延迟;眼距过宽;牙齿萌出延迟|高腭;小头畸形;小下颌畸形;额头高;巨耳畸形;下斜睑裂;眉毛浓密;睑裂上斜;连眉;缺牙症;牙齿排列过挤;攻击性行为;强迫行为;语言发育迟缓;短指畸形综合征;锥形指;癫痫发作;运动发育迟缓;少言寡语;反复感染;脊柱后凸畸形（驼背）;短鼻;表型多样性;第二、三脚趾并趾;注意力缺陷多动障碍;喂养困难;厚嘴唇;指（趾）内弯;智力缺陷	M	10m	Highly suspicious variants associated with the disease phenotype
215	COL11A2	c.5A>G	1	chr6:33160013	NM_080680.3	exon1	p.Glu2Gly	het	0.000739038	Uncertain	AR|AD|AD|AR|AD,AR	Paternal	常染色体隐性耳聋53型|常染色体显性耳聋13型|常染色体显性大耳脊椎骨骺发育不良|常染色体隐性耳脊柱大骨骺发育异常|纤维软骨增生2型	感音神经性耳聋|感音神经性耳聋|腭裂;皮埃尔 - 罗宾序列;扁平颧突;感音神经性耳聋;鼻孔前翻;眼部异常;扁平椎;骨骺发育不良;关节疼痛;早发性关节炎;骨骺膨大;面中部后缩|腭裂;皮埃尔 - 罗宾序列;扁平颧突;小下颌畸形;感音神经性耳聋;混合性听力损失;蒜头鼻;鼻孔前翻;扁平椎;屈曲挛缩;骨骺发育不良;关节疼痛;腰椎前凸过度;喇叭状干骺端;短长骨;关节膨大;早发性关节炎;冠状位脊柱裂;短掌;身材矮小;椎体鸟喙样改变;大跗骨;股骨头骨骺发育不全或发育低下;指间关节突出;反复肺炎;手指的短指骨;短掌骨;面中部后缩|扁平颧突;小下颌畸形;鼻孔前翻;短肋;扁平椎;髂骨发育不全;腹部隆凸;钟形胸;干骺端增宽;耻骨发育不全;坐骨发育不全;短鼻;胸廓发育不全;面中部后缩;干骺端翘弯	M	10m	Highly suspicious variants associated with the disease phenotype
217	PCDH15	c.4699_4715dup	1	chr10:55582770-55582770	NM_033056.4	exon33	p.Leu1573GlufsTer18	het	0.00192555	Uncertain	AR|AR|DR,AR	Maternal	常染色体隐性耳聋23型|Usher综合征IF型|Usher综合征ID/F型	感音神经性耳聋;婴儿期发病|视网膜色素变性;运动发育迟缓;先天性感音神经性听力障碍|听力障碍;视网膜色素变性;前庭功能障碍	M	4.1y	Highly suspicious variants associated with the disease phenotype
217	PCDH15	c.2001G>A	1	chr10:55839181	NM_033056.4	exon17	p.Thr667=	het	0.000399361	Uncertain	AR|AR|DR,AR	Paternal	常染色体隐性耳聋23型|Usher综合征IF型|Usher综合征ID/F型	感音神经性耳聋;婴儿期发病|视网膜色素变性;运动发育迟缓;先天性感音神经性听力障碍|听力障碍;视网膜色素变性;前庭功能障碍	M	4.1y	Highly suspicious variants associated with the disease phenotype
217	WFS1	c.2051C>T	0	chr4:6303573	NM_006005.3	exon8	p.Ala684Val	het		Pathogenic	AD|AD|AR|AD|AD	Paternal	常染色体显性耳聋6型|白内障41型|Wolfram综合征1型|{2型糖尿病}|常染色体显性遗传Wolfram样综合征	渐进性感音神经性听力损失;低频感音神经性听力障碍|先天性白内障;核性白内障|神经源性膀胱功能障碍;睾丸萎缩;输尿管积水;肾积水;感音神经性耳聋;上睑下垂;色素性视网膜病;眼球震颤;视神经萎缩;行为异常;糖尿病;甲状腺功能减退症;尿崩症;智力缺陷;癫痫发作;共济失调;构音障碍;震颤;生长延迟;心肌病;血小板减少症;巨幼细胞性贫血;铁粒幼细胞性贫血;吞咽困难;大脑萎缩;卒中样发作;近端指间关节活动受限|2型糖尿病;胰岛素抵抗;老年时发病;腰臀比增加|听力障碍;青光眼;视神经萎缩;精神病;抑郁;孤独症;幻觉;焦虑;糖尿病;精神分裂症;葡萄糖耐量下降	M	4岁3月	Highly suspicious variants associated with the disease phenotype
216	SLC26A4	c.1226G>A	0	chr7:107330645	NM_000441.2	exon10	p.Arg409His	het	0.0001	Pathogenic	AR|AR	Maternal	Pendred综合征|常染色体隐性耳聋4型伴前庭导水管扩大	甲状腺肿;智力缺陷;前庭功能障碍;代谢紊乱/稳态失衡;甲状腺癌;代偿性甲状腺功能减退症;先天性感音神经性听力障碍;耳蜗畸形|II型耳蜗分隔不全;感音神经性耳聋;前庭导水管扩大	M	2岁4月	Highly suspicious variants associated with the disease phenotype
216	SLC26A4	c.2027T>A	0	chr7:107342495	NM_000441.2	exon17	p.Leu676Gln	het		Likely pathogenic	AR|AR	Paternal	Pendred综合征|常染色体隐性耳聋4型伴前庭导水管扩大	甲状腺肿;智力缺陷;前庭功能障碍;代谢紊乱/稳态失衡;甲状腺癌;代偿性甲状腺功能减退症;先天性感音神经性听力障碍;耳蜗畸形|II型耳蜗分隔不全;感音神经性耳聋;前庭导水管扩大	M	2岁4月	Highly suspicious variants associated with the disease phenotype
218	PTPRQ	c.5254G>A	1	chr12:81025994	NM_001145026.2	exon36	p.Val1752Ile	het	0.000641849	Uncertain	AR|AD	unverified	常染色体隐性耳聋84A型|常染色体显性耳聋73型	听力障碍;运动发育迟缓;前庭功能障碍;婴儿期发病|听力障碍;渐进性听力损失;高频听力障碍	M	13.4y	Highly suspicious variants associated with the disease phenotype
218	PTPRQ	c.5644C>T	1	chr12:81046598	NM_001145026.2	exon40	p.Pro1882Ser	het	0.000641849	Uncertain	AR|AD	unverified	常染色体隐性耳聋84A型|常染色体显性耳聋73型	听力障碍;运动发育迟缓;前庭功能障碍;婴儿期发病|听力障碍;渐进性听力损失;高频听力障碍	M	13.4y	Highly suspicious variants associated with the disease phenotype
218	TIMM8A	c.158del	0	chrX:100601622-100601623	NM_004085.4	exon2	p.Pro53GlnfsTer12	hemi		Likely pathogenic	XLR	unverified	Mohr-Tranebjaerg综合征	渐进性感音神经性听力损失;视觉障碍;视网膜电流图异常;近视;畏光;狭窄视野;痉挛;构音障碍;智能衰退;肌张力障碍;震颤;反射亢进;吞咽困难;姿势异常;骨折易感性增加;中心视力下降;学语后感音神经性听力损失;儿童期发病;皮质视觉障碍	M	13.4y	Highly suspicious variants associated with the disease phenotype
219	MYO1A	c.893-2A>C	0	chr12:57437144	NM_005379.4	intron10		het		Likely pathogenic	AD	Maternal	常染色体显性耳聋48型	感音神经性耳聋	M	2m	Highly suspicious variants associated with the disease phenotype
219	GJB2	c.299_300del	0	chr13:20763420-20763422	NM_004004.6	exon2	p.His100ArgfsTer14	het	0.00128205	Pathogenic	AD|AD|AD|AD|AD|AR,DD|AD	Maternal	掌跖皮肤角化病伴耳聋|残毁性掌跖角皮症|角膜炎-鱼鳞病-耳聋综合征|常染色体显性耳聋3A型|高起样鱼鳞病伴耳聋|常染色体隐性耳聋1A型|BART-PUMPHREY综合症	听力障碍;掌跖角化|听力障碍;手的自发性离断;蜂窝状掌跖角化;羊膜带狭窄环;儿童期发病;关节垫|沟裂舌;感音神经性耳聋;复发性角膜糜烂;眉毛稀疏;角膜瘢痕;畏光;失明;睫毛稀疏;角化过度;少汗症;干燥性角结膜炎;倒睫;高弓足;指甲发育不良;口腔白斑;鳞状细胞癌;肘屈曲挛缩;复发性细菌性皮肤感染;膝关节屈曲挛缩;鱼鳞病;甲营养不良;角膜基质异常;角膜溃疡|感音神经性耳聋|感音神经性耳聋;眉毛稀疏;睫毛缺失;睫毛稀疏;掌跖角化症;剥脱性皮炎;高弓足;鳞状细胞癌;婴儿期发病;头皮瘢痕性脱发;鱼鳞病;点状角膜炎|感音神经性耳聋;前庭功能障碍;双基因遗传|听力障碍;白甲	M	2m	Highly suspicious variants associated with the disease phenotype
219	GJB2	c.235del	0	chr13:20763485-20763486	NM_004004.6	exon2	p.Leu79CysfsTer3	het	0.0102564	Pathogenic	AD|AD|AD|AD|AD|AR,DD|AD	Paternal	掌跖皮肤角化病伴耳聋|残毁性掌跖角皮症|角膜炎-鱼鳞病-耳聋综合征|常染色体显性耳聋3A型|高起样鱼鳞病伴耳聋|常染色体隐性耳聋1A型|BART-PUMPHREY综合症	听力障碍;掌跖角化|听力障碍;手的自发性离断;蜂窝状掌跖角化;羊膜带狭窄环;儿童期发病;关节垫|沟裂舌;感音神经性耳聋;复发性角膜糜烂;眉毛稀疏;角膜瘢痕;畏光;失明;睫毛稀疏;角化过度;少汗症;干燥性角结膜炎;倒睫;高弓足;指甲发育不良;口腔白斑;鳞状细胞癌;肘屈曲挛缩;复发性细菌性皮肤感染;膝关节屈曲挛缩;鱼鳞病;甲营养不良;角膜基质异常;角膜溃疡|感音神经性耳聋|感音神经性耳聋;眉毛稀疏;睫毛缺失;睫毛稀疏;掌跖角化症;剥脱性皮炎;高弓足;鳞状细胞癌;婴儿期发病;头皮瘢痕性脱发;鱼鳞病;点状角膜炎|感音神经性耳聋;前庭功能障碍;双基因遗传|听力障碍;白甲	M	2m	Highly suspicious variants associated with the disease phenotype
222	OTOF	c.5989del	0	chr2:26680912-26680913	NM_001287489.2	exon46	p.Ala1997HisfsTer68	het		Likely pathogenic	AR|AR	Paternal	常染色体隐性耳聋9型|常染色体隐性遗传听觉神经病1型	感音神经性耳聋;脑干听觉反应消失;声反射缺失;先天性感音神经性听力障碍;极重度感音神经性听力损失;重度感音神经性耳聋;出生时发病|先天性感音神经性听力障碍;极重度感音神经性听力损失;声反射缺失;脑干听觉反应消失;感音神经性耳聋;重度感音神经性耳聋;出生时发病	M	5m	Highly suspicious variants associated with the disease phenotype
222	OTOF	c.1498C>T	0	chr2:26705355	NM_194248.3	exon14	p.Arg500Ter	het	3.1837e-05	Pathogenic	AR|AR	Maternal	常染色体隐性耳聋9型|常染色体隐性遗传听觉神经病1型	感音神经性耳聋;脑干听觉反应消失;声反射缺失;先天性感音神经性听力障碍;极重度感音神经性听力损失;重度感音神经性耳聋;出生时发病|先天性感音神经性听力障碍;极重度感音神经性听力损失;声反射缺失;脑干听觉反应消失;感音神经性耳聋;重度感音神经性耳聋;出生时发病	M	5m	Highly suspicious variants associated with the disease phenotype
223	STRC		0			exon19-26		纯合缺失		Pathogenic		unverified			M	1.8y	Highly suspicious variants associated with the disease phenotype
224	ATP11A	c.2956G>A	1	chr13:113516854	NM_032189.4	exon25	p.Val986Met	het	9.94487e-05	Uncertain	AD|AD	Paternal	常染色体显性遗传耳聋84|脑白质营养不良，髓鞘形成不足，24	渐进性感音神经性听力损失|全面发育迟缓	F	8.5y	Mutations that may be associated with disease but whose pathogenicity is unknown
225	TMC1	c.236+5G>A	0	chr9:75309635	NM_138691.3	intron7	p.?	het		Uncertain	AD|AR	Maternal	常染色体显性耳聋36型|常染色体隐性耳聋7型	耳鸣;感音神经性耳聋|感音神经性耳聋	M	7m	Highly suspicious variants associated with the disease phenotype
225	TMC1	c.1333C>T	0	chr9:75406910	NM_138691.3	exon16	p.Arg445Cys	het	0.0003	Likely pathogenic	AD|AR	Paternal	常染色体显性耳聋36型|常染色体隐性耳聋7型	耳鸣;感音神经性耳聋|感音神经性耳聋	M	7m	Highly suspicious variants associated with the disease phenotype
234	GJB2	c.299_300del	0	chr13-20763420-20763422	NM_004004	exon2	p.H100Rfs*14	het		pathogenic	AR	Maternal			F	1y
234	GJB2	c.235delC	0	chr13-20763485-20763486	NM_004004	exon2	p.L79Cfs*3	het	0.0016	pathogenic	AR	Paternal			F	1y
237	GJB2	c.299_300del	0	chr13-20763420-20763422	NM_004004	exon2	p.H100Rfs*14	hom		pathogenic	AR	parent			M	1y
238	GJB2	c.109G>A	0	chr13-20763612	NM_004004	exon2	p.V37I	hom	0.0154	Uncertain	AR	parent			M	1y
238	TNC	c.5797G>T	0	chr9-117793955	NM_002160	exon23	p.V1933L	het		Uncertain	AD	Maternal			M	1y
238	GATA3	c.436G>T	0	chr10-8100462	NM_001002295	exon3	p.A146S	het		Uncertain	AD	Paternal			M	1y
239	GJB2	c.235delC	0	chr13-20763485-20763486	NM_004004	exon2	p.L79Cfs*3	het	0.0016	Pathogenic	AR	Maternal			M	1y
239	GJB2	c.109G>A	0	chr13-20763612	NM_004004	exon2	p.V37I	het	0.0154	Uncertain	AR	Paternal			M	1y
242	MITF	c.397G>T	0	chr3-69990438	NM_000248	exon4	p.E133X	het		Likely pathogenic	1.AD 2.AR 3.AD 4.AD 5.-	unverified			F	1y
242	MYH14	c.5384G>A	0	chr19-50796859	NM_001145809	exon39	p.R1795H	het		Likely pathogenic	AD	unverified			F	1y
242	PTPN11	c.1124A>G	0	chr12-112919909	NM_002834	exon10	p.Y375C	het	0.0002	Uncertain	1.- 2.AD 3.AD 4.AD	unverified			F	1y
244	GJB2	c.299_300del	0	chr13-20763420-20763422	NM_004004	exon2	p.H100Rfs*14	het		pathogenic	AR	Paternal			M	1y
244	GJB2	c.109G>A	0	chr13-20763612	NM_004004	exon2	p.V37I	het	0.0154	Uncertain	AR	Maternal			M	1y
246	GJB2	c.109G>A	0	chr13-20763612	NM_004004	exon2	p.V37I	hom	0.0154	Uncertain	AR	unverified			F	2y
246	SIX5	c.832G>A	0	chr19-46270385	NM_175875	exon2	p.D278N	het	0.0002	Likely pathogenic	AD	de novo			F	1y
247	CEACAM16	c.437G>C	0	chr19-45207342	NM_001039213	exon4	p.R146P	het		Uncertain	AD	Maternal			M	1y
247	KCNQ4	c.140T>C	0	chr1-41249905	NM_004700	exon1	p.L47P	het		Uncertain	AD	Paternal			M	1y
247	USH2A	c.1048G>A	0	chr1-216498742	NM_206933	exon6	p.V350I	het	0.0002	Likely pathogenic	1.- 2.AR	Paternal			M	1y
248	MYH14	c.1058T>A	0	chr19-50735271	NM_001145809	exon10	p.F353Y	het		Uncertain	AD	Paternal			F	1y
248	PROKR2	c.685G>C	0	chr20-5283156	NM_144773	exon3	p.G229R	het		Likely pathogenic	AD	Paternal			F	1y
249	CHD7	c.3952T>G	0	chr8-61748805	NM_017780	exon16	p.C1318G	het		Uncertain	1.AD 2.-	Maternal			M	1y
249	GJB3	c.131G>A	0	chr1-35250494	NM_024009	exon2	p.W44X	het		Likely pathogenic	1.AD 2.AD,AR 3.AR	Maternal			M	1y
249	SIX5	c.804-4CG>TA	0	chr19-46270417	NM_175875	exon2	splicing	het		Uncertain	AD	Maternal			M	1y
251	SLC26A4	c.919-2A>G	0	chr7-107323898	NM_000441	exon8	splicing	het		pathogenic	AR	Paternal			F	2y
251	SLC26A4	c.2168A>G	0	chr7-107350577	NM_000441	exon19	p.H723R	het	0.0004	pathogenic	AR	Maternal			F	2y
252	FGFR3	c.431C>T	0	chr4-1801525	NM_000142	exon4	p.T144I	het		Uncertain	1.AD 2.- 3.AD 4.AD 5.AD,AR 6.AD 7.AD 8.AD 9.AD 10.AD	Paternal			F	1y
252	GJB2	c.571T>C	0	chr13-20763150	NM_004004	exon2	p.F191L	het	0.0002	Likely pathogenic	1.AD 2.AD 3.AD 4.AD 5.AD 6.AR 7.AD	Paternal			F	1y
252	LHFPL5	c.26A>G	0	chr6-35773473	NM_182548	exon1	p.E9G	het		Uncertain	AR	Maternal			F	1y
252	LHFPL5	c.200A>G	0	chr6-35773647	NM_182548	exon1	p.Y67C	het	0.0002	Likely pathogenic	AR	Paternal			F	1y
252	LOXHD1	c.4741-1G>A	0	chr18-44104565	NM_144612	exon31	splicing	het		Likely pathogenic	AR	Paternal			F	1y
252	LOXHD1	c.4180G>A	0	chr18-44114330	NM_144612	exon27	p.V1394M	het	0.0002	Likely pathogenic	AR	Maternal			F	1y
252	PROKR2	c.674T>C	0	chr20-5283167	NM_144773	exon3	p.L225P	het		Uncertain	AD	Maternal			F	1y
253	SLC26A4	c.919-2A>G	0	chr7-107323898	NM_000441	exon8	splicing	hom		pathogenic	AR	parent			F	5y
257	MYH9	c.4418A>G	0	chr22-36685270	NM_002473	exon32	p.E1473G	het		Uncertain	AD	Maternal			F	1y
257	MYO15A	c.2091_2100del	0	chr17-18024204-18024214	NM_016239	exon2	p.H700Pfs*25	het		pathogenic	AR	Paternal			F	1y
257	MYO15A	c.3524dupA	0	chr17-18025637-18025637	NM_016239	exon2	p.S1176Vfs*14	het		Likely pathogenic	AR	Maternal			F	1y
259	SEMA3E	c.1459-1G>A	0	chr7-83023655	NM_012431	exon13	splicing	het		Uncertain	AD	Maternal			M	4y
259	USH2A	c.12790G>A	0	chr1-215848463	NM_206933	exon63	p.E4264K	het	0.0008	Likely pathogenic	1.- 2.AR	Paternal			M	4y
259	USH2A	c.3184G>T	0	chr1-216380747	NM_206933	exon16	p.G1062X	het		pathogenic	1.- 2.AR	Maternal			M	4y
227	SEMA3E	c.1814T	0	chr7-82997236	NM_0011 78129	exon17	p.V605A	het		Uncertain		unverified			M	10y
228	MYH9	c.4390C >T	0	chr22- 36685298	NM_0024 73	exon32	p.R1464C	het		Uncertain		Maternal			F	5y
